# Supplementary material for: Evaluating the utility of camera traps in field studies of predation
Source: PeerJ. 2019 Feb 25;7:e6487. doi: 10.7717/peerj.6487 (PMC6394347; doi:10.7717/peerj.6487)
Supplement: Supplemental Information 17 — All species captured on camera trap videos for each camera trap employed during each field experiment. [file peerj-07-6487-s017.xlsx]

## Sheet: Ecuador
					Attack or Avoidance	Total Number of Videos	31		Total number of videos	527
cam1, lem.sur1	Videos	Time	Date			Videos with non-human vertebrates without nothing	21		Total videos with non-human vertebrates without nothing	229
collared peccary	1	16:12:00	2017-02-12			Encounters of non-human vertebrates without nothing	2		Total encounters of non-human vertebrates without nothing	181
peccary sp.	3	00:58:00	2017-02-13			Number of videos with potential snake predators	19		Total number of videos with potential snake predators	87
collared peccary	7,8,9	13:06, 13:07, 13:09	2017-02-13		Avoidance	Encounters of potential snake predators	7		Total encounters of potential snake predators	67
bird (unidentifiable)	10	18:16:00	2017-02-13			Number of potential snake predators detecting models	2		Total number of potential snake predator detections	18
collared peccary	11,12,13,14	8:06, 8:07, 8:08, 8:10	2017-02-15		Avoidance	Number of potential snake predators attacking models	0		Total number of potential snake predator attacks	2
collared peccary	16,17	10:17, 10:19	2017-02-16		Avoidance	Number of potential snake predators "avoiding" models	2		Total number of potential snake predator avoidances	16
peccary sp.	18	10:47:00	2017-02-16
collared peccary	19,20,21	16:32, 16:33, 16:34	2017-02-17
cam1, spixii1	Videos	Time	Date
mouse	1	03:32:00	2017-02-20
gray winged trumpeter	2	17:06:00	2017-02-22
nine-banded armadillo	3	03:33:00	2017-02-24
collared peccary	5	08:53:00	2017-02-25
collared peccary	6	13:00:00	2017-02-25
cam2, brown1	Videos	Time	Date			Total Number of Videos	31
mouse	5	03:33:00	2017-02-18			Videos with non-human vertebrates without nothing	20
						Encounters of non-human vertebrates without nothing	17
cam2, lem.sur4	Videos	Time	Date			Number of videos with potential snake predators	14
collared peccary	1,2,3	8:26, 8:27, 8:28	2017-02-19		Avoidance	Encounters of potential snake predators	10
dove	4	07:42:00	2017-02-23			Number of potential snake predators detecting models	4
collared peccary	4	14:10:00	2017-02-19			Number of potential snake predators attacking models	0
dove	5	06:55:00	2017-02-24			Number of potential snake predators "avoiding" models	4
collared peccary	5,6	14:11, 14:12	2017-02-19		Avoidance
collared peccary	6	09:22:00	2017-02-24
collared peccary	7	09:12:00	2017-02-25
mammal (unidentifiable)	8	18:01:00	2017-02-19
collared peccary	8	09:13:00	2017-02-25
collared peccary	9_2.25	12:51:00	2017-02-25		Avoidance
dove	10	17:11:00	2017-02-25
gray-winged trumpeter	10	14:17:00	2017-02-20		Avoidance
dove	12	07:25:00	2017-02-26
mouse	12	04:56:00	2017-02-22
collared peccary	13	10:32:00	2017-02-22
cam3, spixii7	Videos	Time	Date			Total Number of Videos	13
agouti	1	07:43:00	2017-02-13			Videos with non-human vertebrates without nothing	9
mouse	2,3	8:59, 9:00	2017-02-13			Encounters of non-human vertebrates without nothing	8
peccary sp.	4	08:12:00	2017-02-14			Number of videos with potential snake predators	3
ocelot	7	00:02:00	2017-02-16			Encounters of potential snake predators	3
mouse	10	03:17:00	2017-02-18			Number of potential snake predators detecting models	1
						Number of potential snake predators attacking models	0
cam3, lem.sur1	Videos	Time	Date			Number of potential snake predators "avoiding" models	1
tinamou	1	10:15:00	2017-02-19
collared peccary	2	12:27:00	2017-02-21		Avoidance
gray winged trumpeter	3	17:08:00	2017-02-22
cam4, lem.sur5	Videos	Time	Date			Total Number of Videos	14
deer	1	02:35:00	2017-02-14			Videos with non-human vertebrates without nothing	6
deer	3	21:56:00	2017-02-14			Encounters of non-human vertebrates without nothing	6
						Number of videos with potential snake predators	3
cam4, hemprichii1	Videos	Time	Date			Encounters of potential snake predators	3
gray winged trumpeter	1	06:12:00	2017-02-20			Number of potential snake predators detecting models	1
dove	2	14:16:00	2017-02-20			Number of potential snake predators attacking models	0
peccary sp.	3	06:46:00	2017-02-23			Number of potential snake predators "avoiding" models	1
gray winged trumpeter	7	10:28:00	2017-02-26		Avoidance
cam5	Videos	Time	Date			Total Number of Videos	3
dove	1	10:25:00	2017-02-19			Videos with non-human vertebrates without nothing	2
dove	2	08:45:00	2017-02-22			Encounters of non-human vertebrates without nothing	2
						Number of videos with potential snake predators	0
						Encounters of potential snake predators	0
						Number of potential snake predators detecting models	0
						Number of potential snake predators attacking models	0
						Number of potential snake predators "avoiding" models	0
cam6	Videos	Time	Date			Total Number of Videos	16
mammal (unidentifiable)	6	14:23:00	2017-02-13			Videos with non-human vertebrates without nothing	3
Kentropyx pulviceps	9	12:20:00	2017-02-18			Encounters of non-human vertebrates without nothing	3
white-lipped peccary	15	11:00:00	2017-02-24			Number of videos with potential snake predators	1
						Encounters of potential snake predators	1
						Number of potential snake predators detecting models	0
						Number of potential snake predators attacking models	0
						Number of potential snake predators "avoiding" models	0
cam7	Videos	Time	Date			Total Number of Videos	18
Kentropyx pulviceps	8,9	13:08, 13:10	2017-02-18			Videos with non-human vertebrates without nothing	7
Kentropyx pulviceps	10	11:38:00	2017-02-19			Encounters of non-human vertebrates without nothing	5
Kentropyx pulviceps	14	13:38:00	2017-02-20			Number of videos with potential snake predators	3
Gray winged trumpeter	16	08:41:00	2017-02-22		Attack	Encounters of potential snake predators	2
white-lippped peccary	17,18	11:04, 11:05	2017-02-24			Number of potential snake predators detecting models	1
						Number of potential snake predators attacking models	1
						Number of potential snake predators "avoiding" models	0
cam8, T3 hemprichii9	Videos	Time	Date			Total Number of Videos	30
bird	3	14:33:00	2017-02-12			Videos with non-human vertebrates without nothing	14
bird (unidentifiable)	4	07:03:00	2017-02-13			Encounters of non-human vertebrates without nothing	11
bird	5	08:19:00	2017-02-13			Number of videos with potential snake predators	10
agouti	6	12:49:00	2017-02-13			Encounters of potential snake predators	2
agouti	9,10	5:25, 5:29	2017-02-13			Number of potential snake predators detecting models	1
bird	11	07:35:00	2017-02-14			Number of potential snake predators attacking models	1
agouti	12	17:51:00	2017-02-14			Number of potential snake predators "avoiding" models	0
bird	13	10:56:00	2017-02-16
bird	14	11:42:00	2017-02-16
white-lipped peccary	15,16,17	15:11, 15:12, 15:13	2017-02-17		Attack
white-lipped peccary	18	08:55:00	2017-02-17
cam8, spixii3	Videos	Time	Date
collared peccary	1,2,3	8:28, 8:29, 8:30	2017-02-19
gray winged trumpeter	5	14:18:00	2017-02-20
peccary sp. (unidentifiable)	6	05:19:00	2017-02-21
collared peccary	7	17:31:00	2017-02-22
bird	9	16:08:00	2017-02-24
tinamou	10	17:42:00	2017-02-24
collared peccary	11	08:43:00	2017-02-25
dove	12	06:50:00	2017-02-26
cam9	Videos	Time	Date			Total Number of Videos	11
dove	1	18:05:00	2017-02-12			Videos with non-human vertebrates without nothing	8
dove	2	18:00:00	2017-02-13			Encounters of non-human vertebrates without nothing	8
dove	3	15:05:00	2017-02-14			Number of videos with potential snake predators	0
tinamou	5	17:36:00	2017-02-14			Encounters of potential snake predators	0
mouse	7	05:46:00	2017-02-17			Number of potential snake predators detecting models	0
dove	8	09:57:00	2017-02-18			Number of potential snake predators attacking models	0
tinamou	9	06:11:00	2017-02-19			Number of potential snake predators "avoiding" models	0
dove	10	17:07:00	2017-02-24
cam10	Videos	Time	Date			Total Number of Videos	18
mammal (unidentifiable)	17	15:57:00	2017-02-25			Videos with non-human vertebrates without nothing	1
						Encounters of non-human vertebrates without nothing	0
						Number of videos with potential snake predators	0
						Encounters of potential snake predators	0
						Number of potential snake predators detecting models	0
						Number of potential snake predators attacking models	0
						Number of potential snake predators "avoiding" models	0
cam11	Videos	Time	Date			Total Number of Videos	15
deer	11	05:58:00	2017-02-17			Videos with non-human vertebrates without nothing	4
gray winged trumpeter	12	17:44:00	2017-02-18			Encounters of non-human vertebrates without nothing	4
lowland paca	14	20:37:00	2017-02-20			Number of videos with potential snake predators	2
gray winged trumpeter	15	16:38:00	2017-02-22			Encounters of potential snake predators	2
						Number of potential snake predators detecting models	0
						Number of potential snake predators attacking models	0
						Number of potential snake predators "avoiding" models	0
cam12	Videos	Time	Date			Total Number of Videos	35
dove	1	13:20:00	2017-02-12			Videos with non-human vertebrates without nothing	5
collared peccary	6,7,8	17:40, 17:41, 17:43	2017-02-15		Avoidance	Encounters of non-human vertebrates without nothing	3
mammal (unidentifiable)	26	08:34:00	2017-02-22			Number of videos with potential snake predators	3
						Encounters of potential snake predators	1
						Number of potential snake predators detecting models	1
						Number of potential snake predators attacking models	0
						Number of potential snake predators "avoiding" models	1
cam13	Videos	Time	Date			Total Number of Videos	8
slate-colored hawk	1,2	10:43, 10:44	2017-02-12			Videos with non-human vertebrates without nothing	5
mouse	4	01:03:00	2017-02-14			Encounters of non-human vertebrates without nothing	4
mouse	7	03:31:00	2017-02-24			Number of videos with potential snake predators	2
mouse	8	22:37:00	2017-02-25			Encounters of potential snake predators	1
						Number of potential snake predators detecting models	0
						Number of potential snake predators attacking models	0
						Number of potential snake predators "avoiding" models	0
cam14	Videos	Time	Date			Total Number of Videos	39
mammal (unidentifiable)	1	10:52:00	2017-02-14			Videos with non-human vertebrates without nothing	30
dove	5	15:46:00	2017-02-15			Encounters of non-human vertebrates without nothing	24
lowland paca	6	20:45:00	2017-02-15			Number of videos with potential snake predators	1
lowland paca	7	23:08:00	2017-02-15			Encounters of potential snake predators	1
dove	8	15:00:00	2017-02-17			Number of potential snake predators detecting models	0
lowland paca	10	01:27:00	2017-02-20			Number of potential snake predators attacking models	0
dove	11	08:13:00	2017-02-20			Number of potential snake predators "avoiding" models	0
mouse	12	22:44:00	2017-02-20
lowland paca	13	22:51:00	2017-02-20
mouse	14	02:47:00	2017-02-21
dove	15	08:25:00	2017-02-21
dove	16	13:06:00	2017-02-21
animal (unidentifiable)	17	18:11:00	2017-02-21
mouse	18	03:24:00	2017-02-22
tinamou	19	18:05:00	2017-02-22
mammal (unidentifiable)	21	20:33:00	2017-02-22
mouse	22	21:33:00	2017-02-22
mouse	23,24,25	22:57, 23:15, 23:22	2017-02-22
mouse	26,27,29,30,32	00:14, 00:19, 00:26, 00:39, 00:57	2017-02-23
dove	33	10:02:00	2017-02-23
dove	34	10:47:00	2017-02-24
nine-banded armadillo	36	04:58:00	2017-02-25
dove	37	08:31:00	2017-02-25
agouti	39	08:57:00	2017-02-26
cam15	Videos	Time	Date			Total Number of Videos	14
tinamou	1	12:45:00	2017-02-12			Videos with non-human vertebrates without nothing	8
gray winged trumpeter	2	11:22:00	2017-02-14			Encounters of non-human vertebrates without nothing	8
giant armadillo	5	00:39:00	2017-02-16			Number of videos with potential snake predators	3
dove	8	14:34:00	2017-02-17			Encounters of potential snake predators	3
dove	9	07:15:00	2017-02-19			Number of potential snake predators detecting models	0
collared peccary	12	07:52:00	2017-02-23			Number of potential snake predators attacking models	0
collared peccary	13	11:04:00	2017-02-24			Number of potential snake predators "avoiding" models	0
mouse	14	01:20:00	2017-02-26
cam16	Videos	Time	Date			Total Number of Videos	5
gray winged trumpeter	2	17:21:00	2017-02-19			Videos with non-human vertebrates without nothing	2
mouse	5	23:01:00	2017-02-25			Encounters of non-human vertebrates without nothing	1
						Number of videos with potential snake predators	1
						Encounters of potential snake predators	1
						Number of potential snake predators detecting models	0
						Number of potential snake predators attacking models	0
						Number of potential snake predators "avoiding" models	0
cam17	Videos	Time	Date			Total Number of Videos	10
brown nunlet	1	16:19:00	2017-02-13			Videos with non-human vertebrates without nothing	5
brown nunlet	3	09:39:00	2017-02-15			Encounters of non-human vertebrates without nothing	5
Kentropyx pulviceps	8	10:59:00	2017-02-20			Number of videos with potential snake predators	3
mouse	9	00:29:00	2017-02-21			Encounters of potential snake predators	3
gray winged trumpeter	10	13:47:00	2017-02-21			Number of potential snake predators detecting models	0
						Number of potential snake predators attacking models	0
						Number of potential snake predators "avoiding" models	0
cam18	Videos	Time	Date			Total Number of Videos	10
mammal (unidentifiable)	4	09:00:00	2017-02-18			Videos with non-human vertebrates without nothing	6
nine-banded armadillo	5	21:26:00	2017-02-18		Avoidance	Encounters of non-human vertebrates without nothing	6
mouse	6	01:19:00	2017-02-19			Number of videos with potential snake predators	2
gray winged trumpeter	7	07:48:00	2017-02-19		Avoidance	Encounters of potential snake predators	2
gray winged trumpeter	9	13:54:00	2017-02-21			Number of potential snake predators detecting models	0
mouse	10	21:05:00	2017-02-23			Number of potential snake predators attacking models	0
						Number of potential snake predators "avoiding" models	0
cam19	Videos	Time	Date			Total Number of Videos	9
agouti	2	10:33:00	2017-02-17			Videos with non-human vertebrates without nothing	6
lowland paca	5	00:17:00	2017-02-19			Encounters of non-human vertebrates without nothing	6
mammal (unidentifiable)	6	20:48:00	2017-02-19			Number of videos with potential snake predators	0
tinamou	7	11:44:00	2017-02-21			Encounters of potential snake predators	0
lowland paca	8	23:08:00	2017-02-24			Number of potential snake predators detecting models	0
lowland paca	9	22:47:00	2017-02-25			Number of potential snake predators attacking models	0
						Number of potential snake predators "avoiding" models	0
cam20	Videos	Time	Date			Total Number of Videos	11
agouti	4	18:07:00	2017-02-19			Videos with non-human vertebrates without nothing	3
gray winged trumpeter	5	15:04:00	2017-02-21			Encounters of non-human vertebrates without nothing	3
mouse	8	02:58:00	2017-02-23			Number of videos with potential snake predators	1
						Encounters of potential snake predators	1
						Number of potential snake predators detecting models	0
						Number of potential snake predators attacking models	0
						Number of potential snake predators "avoiding" models	0
cam21	Videos	Time	Date			Total Number of Videos	14
agouti	1	06:41:00	2017-02-14			Videos with non-human vertebrates without nothing	11
dove	2	13:11:00	2017-02-14			Encounters of non-human vertebrates without nothing	11
dove (unidentifiable)	3	07:07:00	2017-02-16			Number of videos with potential snake predators	2
lowland paca	4	23:17:00	2017-02-18			Encounters of potential snake predators	2
agouti	5	10:28:00	2017-02-19			Number of potential snake predators detecting models	0
gray winged trumpeter	6	15:04:00	2017-02-21			Number of potential snake predators attacking models	0
mouse	7	20:39:00	2017-02-21			Number of potential snake predators "avoiding" models	0
tinamou	8	06:54:00	2017-02-22
dove	9	13:31:00	2017-02-22
collared peccary	11	11:18:00	2017-02-23
mouse	13	21:05:00	2017-02-24
camdif	Videos	Time	Date			Total Number of Videos	9
tinamou	99					Videos with non-human vertebrates without nothing	3
collared peccary	101103	13:50:00			Avoidance	Encounters of non-human vertebrates without nothing	2
						Number of videos with potential snake predators	2
						Encounters of potential snake predators	1
						Number of potential snake predators detecting models	1
indo1	Videos	Time	Date			Number of potential snake predators attacking models	0
camera apparently stopped working						Number of potential snake predators "avoiding" models	1
						Total Number of Videos	13
						Videos with non-human vertebrates without nothing	3
indo2	Videos	Time	Date			Encounters of non-human vertebrates without nothing	3
mammal (unidentifiable)	3	23:54:00	2017-02-14			Number of videos with potential snake predators	0
mammal (unidentifiable)	6	01:08:00	2017-02-16			Encounters of potential snake predators	0
lowland paca	9	21:49:00	2017-02-18			Number of potential snake predators detecting models	0
						Number of potential snake predators attacking models	0
						Number of potential snake predators "avoiding" models	0
indo3	Videos	Time	Date			Total Number of Videos	45
mouse	22	21:13:00	2017-02-19			Videos with non-human vertebrates without nothing	3
lizard	27	13:13:00	2017-02-20			Encounters of non-human vertebrates without nothing	3
lizard sp. (unidentifiable)	40	12:51:00	2017-02-23			Number of videos with potential snake predators	0
						Encounters of potential snake predators	0
						Number of potential snake predators detecting models	0
						Number of potential snake predators attacking models	0
						Number of potential snake predators "avoiding" models	0
indo4	Videos	Time	Date			Total Number of Videos	8
peccary sp.	2	15:09:00	2017-02-16			Videos with non-human vertebrates without nothing	2
ocelot	4	17:50:00	2017-02-16			Encounters of non-human vertebrates without nothing	2
						Number of videos with potential snake predators	2
						Encounters of potential snake predators	2
						Number of potential snake predators detecting models	0
						Number of potential snake predators attacking models	0
						Number of potential snake predators "avoiding" models	0
							0
indo5	Videos	Time	Date			Total Number of Videos	14
tinamou	4,5	18:20, 18:21	2017-02-13			Videos with non-human vertebrates without nothing	6
tinamou	6	06:08:00	2017-02-14			Encounters of non-human vertebrates without nothing	5
lowland paca	8	02:27:00	2017-02-18			Number of videos with potential snake predators	1
Kentropyx pulviceps	9	13:30:00	2017-02-18			Encounters of potential snake predators	1
slate-colored hawk	12	12:24:00	2017-02-26			Number of potential snake predators detecting models	0
						Number of potential snake predators attacking models	0
indo6	Videos	Time	Date			Number of potential snake predators "avoiding" models	0
indo7	Videos	Time	Date			Total Number of Videos	13
dove	5	11:48:00	2017-02-18			Videos with non-human vertebrates without nothing	5
bird (unidentifiable)	6	11:02:00	2017-02-19			Encounters of non-human vertebrates without nothing	4
mammal (unidentifiable)	10	04:59:00	2017-02-23			Number of videos with potential snake predators	0
dove	12,13	08:05:00	2017-02-24			Encounters of potential snake predators	0
						Number of potential snake predators detecting models	0
						Number of potential snake predators attacking models	0
						Number of potential snake predators "avoiding" models	0
indo8	Videos	Time	Date			Total Number of Videos	40
dove	4	09:00:00	2017-02-14			Videos with non-human vertebrates without nothing	17
dove	5,6	15:19, 15:20	2017-02-14			Encounters of non-human vertebrates without nothing	13
dove	10	11:35:00	2017-02-15			Number of videos with potential snake predators	4
peccary sp. (unidentifiable)	12	10:50:00	2017-02-19			Encounters of potential snake predators	3
nine-banded armadillo	13,14	0:01, 0:02	2017-02-22			Number of potential snake predators detecting models	0
armadillo (unidentifiable)	16	02:07:00	2017-02-22			Number of potential snake predators attacking models	0
bird (unidentifiable)	17	10:03:00	2017-02-22			Number of potential snake predators "avoiding" models	0
dove	18	10:46:00	2017-02-22
dove	19	11:04:00	2017-02-22
dove	21,22	13:58, 14:16	2017-02-22
dove	22	14:53:00	2017-02-22
peccary sp. (unidentifiable)	30	14:49:00	2017-02-24
dove	32	17:39:00	2017-02-24
dove	38	07:50:00	2017-02-25
indo9	Videos	Time	Date
apparently stopped working
indo10	Videos	Time	Date			Total Number of Videos	30
mammal (unidentifiable)	2	09:48:00	2017-02-15			Videos with non-human vertebrates without nothing	14
lowland paca	5	00:55:00	2017-02-18			Encounters of non-human vertebrates without nothing	12
dove	6	07:03:00	2017-02-18			Number of videos with potential snake predators	5
dove	7	08:30:00	2017-02-18			Encounters of potential snake predators	2
Kentropyx pulviceps	10	13:36:00	2017-02-18			Number of potential snake predators detecting models	2
nine-banded armadillo	13	21:39:00	2017-02-19		Avoidance	Number of potential snake predators attacking models	0
nine-banded armadillo	15	22:49:00	2017-02-20			Number of potential snake predators "avoiding" models	2
lowland paca	19	04:43:00	2017-02-23
lizard sp. (unidentifiable)	20	13:08:00	2017-02-23
colllared peccary	21	17:02:00	2017-02-24		Avoidance
mammal	25	16:01:00	2017-02-25
colllared peccary	26,28,29	13:51, 14:05, 14:07	2017-02-26		Avoidance

## Sheet: Mexico
					Attack, Avoidance or NPD	Total Number of Videos	31		Total number of videos	705
cam1	Videos	Time	Date			Videos with non-human vertebrates without nothing	20		Total videos with non-human vertebrates without nothing	444
dove	1,2	7:49, 7:55	2017-06-22			Encounters of non-human vertebrates without nothing	17		Total encounters of non-human vertebrates without nothing	402
tinamou	3	10:36:00	2017-06-23			Number of videos with potential snake predators	0		Total number of videos with potential snake predators	57
dove	4	15:39:00	2017-06-23			Encounters of potential snake predators	0		Total encounters of potential snake predators	54
dove	5,6	8:07, 8:09	2017-06-24			Number of potential snake predators detecting models	0		Total number of potential snake predator detections	7
dove	9	12:43:00	2017-07-01			Number of potential snake predators attacking models	0		Total number of potential snake predator attacks	7
dove	10	06:52:00	2017-07-02			Number of potential snake predators "avoiding" models	0		Total number of potential snake predator avoidances	0
mouse	11,12	3:03, 3:11	2017-07-03
mouse	13	00:51:00	2017-07-04
mouse	14	03:45:00	2017-07-04
mouse	17	03:25:00	2017-07-09
tinamou	21	10:22:00	2017-07-13
dove	22	10:06:00	2017-07-14
dove	23	15:24:00	2017-07-14
dove	27	14:21:00	2017-07-16
mammal	28	16:57:00	2017-07-16
dove	29	17:08:00	2017-07-16
dove	31	06:10:00	2017-07-18
cam2	Videos	Time	Date			Total Number of Videos	20
orange-billed sparrow	1	08:01:00	2017-06-21			Videos with non-human vertebrates without nothing	10
bird	4	09:52:00	2017-06-23			Encounters of non-human vertebrates without nothing	10
dove	5	17:57:00	2017-06-23			Number of videos with potential snake predators	1
nine-banded armadillo	6	20:59:00	2017-06-24			Encounters of potential snake predators	1
dove	7	05:37:00	2017-06-27			Number of potential snake predators detecting models	0
mammal	10	09:53:00	2017-06-30			Number of potential snake predators attacking models	0
dove	12	06:41:00	2017-07-01			Number of potential snake predators "avoiding" models	0
dove	17	17:58:00	2017-07-15
dove	19	06:05:00	2017-07-16
doves	20	06:22:00	2017-07-17
cam3	Videos	Time	Date			Total Number of Videos	28
tayra	3	16:36:00	2017-06-22			Videos with non-human vertebrates without nothing	17
mouse	6	23:07:00	2017-06-29			Encounters of non-human vertebrates without nothing	17
birds (unidentifiable)	10	06:17:00	2017-07-06			Number of videos with potential snake predators	1
dove	12	10:37:00	2017-07-08			Encounters of potential snake predators	1
hummingbird	13	07:24:00	2017-07-11			Number of potential snake predators detecting models	0
dove	14	18:17:00	2017-07-11			Number of potential snake predators attacking models	0
dove	16	17:57:00	2017-07-12			Number of potential snake predators "avoiding" models	0
dove (unidentifiable)	17	18:25:00	2017-07-12
dove	18	10:43:00	2017-07-13
dove	19	18:12:00	2017-07-14
dove	20	12:27:00	2017-07-16
mouse	23	00:55:00	2017-07-17
bird	24	06:12:00	2017-07-17
dove	25	05:47:00	2017-07-18
dove	26	10:18:00	2017-07-18
dove	27	15:14:00	2017-07-18
dove	28	10:59:00	2017-07-20
cam4	Videos	Time	Date			Total Number of Videos	41
dove	1	11:04:00	2017-06-21			Videos with non-human vertebrates without nothing	27
dove	2	15:25:00	2017-06-21			Encounters of non-human vertebrates without nothing	24
jaguarundi	4	09:38:00	2017-06-26			Number of videos with potential snake predators	1
squirrel	7	12:43:00	2017-07-01			Encounters of potential snake predators	1
dove	8	15:49:00	2017-07-01			Number of potential snake predators detecting models	0
mammal (unidentifiable)	10	17:25:00	2017-07-02			Number of potential snake predators attacking models	0
dove	11	15:27:00	2017-07-02			Number of potential snake predators "avoiding" models	0
dove	15	07:40:00	2017-07-04
ameiva sp.	16,17	11:02, 11:04	2017-07-04
dove	18,19	12:57, 13:00	2017-07-05
mouse	21	22:26:00	2017-07-05
Lowland paca	22	04:04:00	2017-07-06
dove	25	12:50:00	2017-07-06
dove	26	16:20:00	2017-07-06
dove	27	07:36:00	2017-07-07
dove	30	14:12:00	2017-07-09
dove	31	14:31:00	2017-07-09
ameiva sp.	33	10:02:00	2017-07-11
dove	34	12:53:00	2017-07-11
dove	35	09:18:00	2017-07-14
dove	36	06:03:00	2017-07-16
dove	37	11:09:00	2017-07-16
squirrel	38, 39	8:21, 8:22	2017-07-17
dove	40	12:00:00	2017-07-19
cam5	Videos	Time	Date			Total Number of Videos	47
tinamou	1	18:06:00	2017-06-21			Videos with non-human vertebrates without nothing	34
mammal (unidentifiable)	3	04:59:00	2017-06-23			Encounters of non-human vertebrates without nothing	31
bird (unidentifiable)	4	15:37:00	2017-06-24			Number of videos with potential snake predators	12
bird	5	15:38:00	2017-06-24			Encounters of potential snake predators	11
hooded skunk	6	00:35:00	2017-06-25			Number of potential snake predators detecting models	0
mouse	8	03:03:00	2017-06-25			Number of potential snake predators attacking models	0
dove	10	12:40:00	2017-06-25			Number of potential snake predators "avoiding" models	0
bird (unidentifiable)	11	06:24:00	2017-06-26
mammal (unidentifiable)	12	06:41:00	2017-06-26
ameiva sp.	13	11:02:00	2017-06-26
dove	18	05:27:00	2017-06-28
possum	19	20:31:00	2017-06-29
mammal (unidentifiable)	20	01:01:00	2017-07-01
nine-banded armadillo	21	22:13:00	2017-07-02
mammal (unidentifiable)	22	18:54:00	2017-07-03
nine-banded armadillo	24	21:33:00	2017-07-05
nine-banded armadillo	25	22:28:00	2017-07-05
tinamou	27,28	5:53, 5:56	2017-07-06
dove	29	07:36:00	2017-07-06
nine-banded armadillo	31	18:48:00	2017-07-06
nine-banded armadillo	32	23:05:00	2017-07-08
possum	33	01:59:00	2017-07-10
ameiva sp.	34,35	12:12, 12:26	2017-07-12
dove	36	10:11:00	2017-07-13
domestic cat?	37,38	00:51, 00:54	2017-07-14
nine-banded armadillo	39	01:57:00	2017-07-14
dove	40	05:55:00	2017-07-14
possum	41	21:21:00	2017-07-14
dove	42	06:41:00	2017-07-15
possum	43	20:59:00	2017-07-15
mouse	47	03:15:00	2017-07-20
cam6	Videos	Time	Date			Total Number of Videos	43
bird (unidentifiable)	1	09:46:00	2017-06-22			Videos with non-human vertebrates without nothing	30
orange-billed sparrow	2,3	14:00, 14:02	2017-06-23			Encounters of non-human vertebrates without nothing	28
bird	4	10:10:00	2017-06-24			Number of videos with potential snake predators	1
orange-billed sparrow	5	10:52:00	2017-06-24			Encounters of potential snake predators	1
tinamou	6	13:19:00	2017-06-25			Number of potential snake predators detecting models	0
tinamou	7	08:56:00	2017-06-26			Number of potential snake predators attacking models	0
bird	8	11:35:00	2017-06-26			Number of potential snake predators "avoiding" models	0
ameiva sp.	9,10	12:55, 13:11	2017-06-26
dove	11	14:55:00	2017-06-26
ameiva sp.	13	11:30:00	2017-06-27
ameiva sp.	14	13:33:00	2017-06-27
dove	15	09:05:00	2017-06-29
tinamou	18	11:21:00	2017-07-01
ocelot	19	04:46:00	2017-07-02
tinamou	21	06:57:00	2017-07-03
bird (unidentifiable)	23	10:33:00	2017-07-04
tinamou	24	13:02:00	2017-07-06
ameiva sp.	26	14:57:00	2017-07-08
bird (unidentifiable)	28	08:12:00	2017-07-09
ameiva sp.	30	15:15:00	2017-07-09
bird	31	12:20:00	2017-07-10
dove	32	08:34:00	2017-07-11
squirrel	35	17:12:00	2017-07-13
dove	37	13:26:00	2017-07-14
bird	38	14:12:00	2017-07-16
orange-billed sparrow	39	12:33:00	2017-07-17
orange-billed sparrow	40	08:22:00	2017-07-18
bird (unidentifiable)	43	12:03:00	2017-07-20
cam7	Videos	Time	Date			Total Number of Videos	40
lowland paca	2,3	2:26, 2:29	2017-06-22			Videos with non-human vertebrates without nothing	22
nine-banded armadillo	4	02:34:00	2017-06-22			Encounters of non-human vertebrates without nothing	20
lowland paca	5	19:36:00	2017-06-23			Number of videos with potential snake predators	3
dove	6,7	3:11, 3:33	2017-06-28			Encounters of potential snake predators	3
lowland paca	8	02:33:00	2017-06-30			Number of potential snake predators detecting models	1
rat	10	23:15:00	2017-06-30			Number of potential snake predators attacking models	0
dove	12	05:10:00	2017-07-03			Number of potential snake predators "avoiding" models	1
lowland paca	13	03:08:00	2017-07-04				0
bird (unidentifiable)	14	08:54:00	2017-07-04
possum	16	21:45:00	2017-07-04
lowland paca	17	03:23:00	2017-07-05
tinamou	18	11:17:00	2017-07-05
lowland paca	22	04:06:00	2017-07-07
dove	25	15:44:00	2017-07-08
dove (unidentifiable)	30	09:52:00	2017-07-14
lowland paca	31	09:52:00	2017-07-14
possum	35	00:36:00	2017-07-18
lowland paca	36	00:51:00	2017-07-18
tinamou	37	14:31:00	2017-07-18
lowland paca	40	23:26:00	2017-07-19
cam8	Videos	Time	Date			Total Number of Videos	119
Lowland paca	2	02:09:00	2017-06-22			Videos with non-human vertebrates without nothing	57
dove	5	10:34:00	2017-06-22			Encounters of non-human vertebrates without nothing	52
Lowland paca	8	19:33:00	2017-06-23			Number of videos with potential snake predators	12
mouse	9,10	00:32, 00:39	2017-06-24			Encounters of potential snake predators	12
mouse	15	01:42:00	2017-06-24			Number of potential snake predators detecting models	1
bird	18	08:49:00	2017-06-25			Number of potential snake predators attacking models	1
dove	21	07:57:00	2017-06-26			Number of potential snake predators "avoiding" models	0
tinamou	26	09:35:00	2017-06-27
dove	29	16:23:00	2017-06-27
Lowland paca	30	23:28:00	2017-06-27
dove	33	13:54:00	2017-06-29
mammal (unidentifiable)	34	22:49:00	2017-06-29
dove	35,36	2:50, 2:51	2017-06-30
possum	37	00:29:00	2017-07-01		Attack
mouse	38	04:16:00	2017-07-01
dove	39	07:23:00	2017-07-01
dove	41	16:49:00	2017-07-01
mouse	42	03:59:00	2017-07-02
dove	43	08:00:00	2017-07-02
tinamou	45	10:05:00	2017-07-02
possum	49	00:00:00	2017-07-03
orange-billed sparrow	50	10:55:00	2017-07-03
nine-banded armadillo	55	19:29:00	2017-07-03
possum	56	23:27:00	2017-07-03
ameiva	58	10:48:00	2017-07-04
Lowland paca	60	03:21:00	2017-07-05
dove	63	14:51:00	2017-07-05
dove	64	15:55:00	2017-07-05
mouse	68	22:17:00	2017-07-05
possum	70	19:44:00	2017-07-06
bird	71	10:05:00	2017-07-07
dove	77,78,79	3:16, 3:20, 3:21	2017-07-07
dove	81	10:56:00	2017-07-08
dove	82	14:56:00	2017-07-09
mouse	84	20:40:00	2017-07-09
tinamou	88	10:23:00	2017-07-10
tinamou	90	12:09:00	2017-07-10
bird	95	06:46:00	2017-07-12
tinamou	97	14:55:00	2017-07-13
dove	100	05:44:00	2017-07-15
dove	101	11:25:00	2017-07-15
possum	103	20:03:00	2017-07-15
ameiva	104105	1:28, 1:30	2017-07-16
possum	106	22:52:00	2017-07-16
possum	107	00:22:00	2017-07-17
possum	108	01:26:00	2017-07-17
tinamou	109	14:57:00	2017-07-17
possum	110	01:47:00	2017-07-18
possum	111	02:58:00	2017-07-18
tinamou	112	08:30:00	2017-07-18
nine-banded armadillo	115	01:07:00	2017-07-19
dove	116	15:33:00	2017-07-19
cam9	Videos	Time	Date			Total Number of Videos	20
dove	3	16:17:00	2017-06-25			Videos with non-human vertebrates without nothing	10
dove	4	15:19:00	2017-06-26			Encounters of non-human vertebrates without nothing	10
dove	5	16:03:00	2017-06-26			Number of videos with potential snake predators	0
dove	9	13:21:00	2017-06-27			Encounters of potential snake predators	0
orange-billed sparrow	13	06:55:00	2017-07-06			Number of potential snake predators detecting models	0
dove	14	06:57:00	2017-07-06			Number of potential snake predators attacking models	0
dove	15	12:23:00	2017-07-13			Number of potential snake predators "avoiding" models	0
dove	16	06:23:00	2017-07-15				2
dove	17	13:18:00	2017-07-16
orange-billed sparrow	20	07:07:00	2017-07-20
cam10	Videos	Time	Date			Total Number of Videos	32
dove	2	11:39:00	2017-06-23			Videos with non-human vertebrates without nothing	28
mouse	3	02:00:00	2017-06-24			Encounters of non-human vertebrates without nothing	27
tinamou	4	06:39:00	2017-06-24			Number of videos with potential snake predators	3
dove	5	08:00:00	2017-06-24			Encounters of potential snake predators	3
tinamou	6	14:11:00	2017-06-24			Number of potential snake predators detecting models	0
dove	9	11:12:00	2017-06-27			Number of potential snake predators attacking models	0
mouse	10	00:19:00	2017-06-29			Number of potential snake predators "avoiding" models	0
dove	11,12	5:20, 5:23	2017-06-29
orange-billed sparrow	13	05:46:00	2017-07-02
tinamou	14	18:18:00	2017-07-02
raccoon	15	01:45:00	2017-07-03
dove	16	05:56:00	2017-07-04
tinamou	17	14:23:00	2017-07-05
tinamou	19	15:17:00	2017-07-05
tinamou	20	11:16:00	2017-07-06
tayra	21	11:40:00	2017-07-06
dove	22	14:53:00	2017-07-06
possum	23	01:07:00	2017-07-07
birds	24	14:26:00	2017-07-07
dove	25	09:48:00	2017-07-09
doves	26	13:02:00	2017-07-09
dove	27	11:45:00	2017-07-10
tinamou	28	08:15:00	2017-07-11
dove	29	12:58:00	2017-07-13
doves	30	07:57:00	2017-07-15
mouse	31	20:24:00	2017-07-15
lizard	32	16:00:00	2017-07-18
cam11	Videos	Time	Date			Total Number of Videos	17
dove	4	15:19:00	2017-06-25			Videos with non-human vertebrates without nothing	10
dove	5	06:49:00	2017-06-26			Encounters of non-human vertebrates without nothing	10
squirrel	6	16:53:00	2017-07-01			Number of videos with potential snake predators	0
dove	7	05:57:00	2017-07-06			Encounters of potential snake predators	0
dove	9	07:55:00	2017-07-09			Number of potential snake predators detecting models	0
bird (unidentifiable)	10	05:26:00	2017-07-11			Number of potential snake predators attacking models	0
mammal (unidentifiable)	12	04:57:00	2017-07-13			Number of potential snake predators "avoiding" models	0
dove	13	06:08:00	2017-07-13
dove	15	16:09:00	2017-07-15
dove	16	06:44:00	2017-07-18
cam12	Videos	Time	Date			Total Number of Videos	13
dove	1	15:05:00	2017-06-27			Videos with non-human vertebrates without nothing	6
mouse	4	01:23:00	2017-06-29			Encounters of non-human vertebrates without nothing	6
tinamou	6	14:32:00	2017-07-01			Number of videos with potential snake predators	0
tinamou	8	13:43:00	2017-07-03			Encounters of potential snake predators	0
tinamous	11	06:46:00	2017-07-07			Number of potential snake predators detecting models	0
tinamou	12	07:36:00	2017-07-13			Number of potential snake predators attacking models	0
						Number of potential snake predators "avoiding" models	0
cam13	Videos	Time	Date			Total Number of Videos	20
dove	1	09:39:00	2017-06-28			Videos with non-human vertebrates without nothing	13
tinamou	3	17:25:00	2017-06-28			Encounters of non-human vertebrates without nothing	11
mouse	6,7	4:32, 4:35	2017-07-02			Number of videos with potential snake predators	4
dove	9	17:27:00	2017-07-05			Encounters of potential snake predators	3
dove	10	16:23:00	2017-07-06			Number of potential snake predators detecting models	1
tinamou	11	12:57:00	2017-07-07			Number of potential snake predators attacking models	1
mouse	12	04:18:00	2017-07-09			Number of potential snake predators "avoiding" models	0
ocelet	13	21:09:00	2017-07-10
gray fox	15	14:45:00	2017-07-11
gray fox	17,18	4:59, 5:00	2017-07-13		Attack
mammal	20	16:12:00	2017-07-20
cam14	Videos	Time	Date			Total Number of Videos	26
squirrel	1	09:53:00	2017-06-24			Videos with non-human vertebrates without nothing	8
white-nosed coati	2	15:35:00	2017-06-25			Encounters of non-human vertebrates without nothing	8
dove	8	06:24:00	2017-06-29			Number of videos with potential snake predators	1
gray fox	11	11:40:00	2017-07-08		Attack	Encounters of potential snake predators	1
bird (dove)	13	08:43:00	2017-07-12			Number of potential snake predators detecting models	0
squirrel	15	06:25:00	2017-07-13			Number of potential snake predators attacking models	0
mouse	18	01:01:00	2017-07-17			Number of potential snake predators "avoiding" models	0
mouse	22	02:04:00	2017-07-17
cam15	Videos	Time	Date			Total Number of Videos	7
dove	2,3	7:22, 7:28	2017-06-29			Videos with non-human vertebrates without nothing	3
dove	5	05:19:00	2017-07-11			Encounters of non-human vertebrates without nothing	3
dove	6	06:34:00	2017-07-12			Number of videos with potential snake predators	0
						Encounters of potential snake predators	0
						Number of potential snake predators detecting models	0
						Number of potential snake predators attacking models	0
						Number of potential snake predators "avoiding" models	0
cam16	Videos	Time	Date			Total Number of Videos	26
tinamou	1,2	4:37, 4:38	2017-06-22			Videos with non-human vertebrates without nothing	20
mouse	3	02:31:00	2017-06-23			Encounters of non-human vertebrates without nothing	19
mouse	4	01:59:00	2017-06-27			Number of videos with potential snake predators	2
gray fox	6	09:40:00	2017-06-28		Attack	Encounters of potential snake predators	2
ocelot	9	20:56:00	2017-07-01			Number of potential snake predators detecting models	1
Central American agouti?	11	10:02:00	2017-07-03			Number of potential snake predators attacking models	1
mouse	12	02:48:00	2017-07-04			Number of potential snake predators "avoiding" models	0
mammal (unidentifiable)	13	09:34:00	2017-07-06				1
mouse	14	04:28:00	2017-07-07
Central American agouti?	15	06:11:00	2017-07-08
tinamou	16	07:37:00	2017-07-09
dove	17	07:22:00	2017-07-10
Central American agouti?	18	09:25:00	2017-07-10
Central American agouti?	19	10:26:00	2017-07-10
tinamou	21	12:53:00	2017-07-11
tinamou	23	12:33:00	2017-07-15
Central American agouti?	24	12:03:00	2017-07-17
rat	25	21:22:00	2017-07-17
dove	26	12:39:00	2017-07-18
mouse	27	03:32:00	2017-07-20
cam17	Videos	Time	Date			Total Number of Videos	17
tinamou	2	16:39:00	2017-06-26			Videos with non-human vertebrates without nothing	10
mammal (unidentifiable)	7	08:13:00	2017-07-05			Encounters of non-human vertebrates without nothing	9
tinamou	8	17:02:00	2017-07-05			Number of videos with potential snake predators	2
dove	9	06:31:00	2017-07-07			Encounters of potential snake predators	1
dove	10	12:41:00	2017-07-09			Number of potential snake predators detecting models	1
tinamou	13	11:16:00	2017-07-11			Number of potential snake predators attacking models	1
bird (dove?)	14	11:55:00	2017-07-16			Number of potential snake predators "avoiding" models	0
squirrel	15	10:16:00	2017-07-17
gray fox	16.17	11:42, 11:44	2017-07-20		Attack
cam18	Videos	Time	Date			Total Number of Videos	74
dove	2	17:09:00	2017-06-23			Videos with non-human vertebrates without nothing	55
mouse	3	01:58:00	2017-06-24			Encounters of non-human vertebrates without nothing	46
bird (unidentifiable)	8	07:24:00	2017-06-25			Number of videos with potential snake predators	4
dove	9,10	10:43, 10:45	2017-06-26			Encounters of potential snake predators	4
tinamou	11	11:47:00	2017-06-26			Number of potential snake predators detecting models	1
dove	12	16:28:00	2017-06-26			Number of potential snake predators attacking models	1
bird (unidentifiable)	13	06:05:00	2017-06-27			Number of potential snake predators "avoiding" models	0
dove	14	16:30:00	2017-06-27
mammal (unidentifiable)	16	05:35:00	2017-06-29
dove	17	09:10:00	2017-06-29
dove	18	11:16:00	2017-06-29
lowland paca	20	23:12:00	2017-06-29
Central American Agouti?	23	11:20:00	2017-07-02
dove	24	15:09:00	2017-07-03
squirrel	25,26	10:05, 10:07	2017-07-05
nine-baded armadillo	29	20:17:00	2017-07-06
mammal (unidentifiable)	30	05:25:00	2017-07-07
squirrel	31	07:17:00	2017-07-07
bird	32	12:30:00	2017-07-07
dove	33	16:09:00	2017-07-08
tinamou	34	06:05:00	2017-07-09
tinamous	36	18:03:00	2017-07-09
mammal (unidentifiable); rodent	37	21:47:00	2017-07-09
dove	39	07:35:00	2017-07-10
squirrel	41	09:57:00	2017-07-10
tinamou	42	16:06:00	2017-07-10
dove	44	06:14:00	2017-07-11
tinamou	45	07:56:00	2017-07-11
tinamou	47	09:37:00	2017-07-11
mouse	48,49,50	8:11, 8:13, 8:14	2017-07-13
mouse	51,52	9:15, 9:28	2017-07-13
mouse	53	10:04:00	2017-07-13
squirrel	54	05:50:00	2017-07-14
dove	55,56	11:50, 11:53	2017-07-14
ocelot	57	18:55:00	2017-07-14
tinamou	59,60,61	4:45, 4:46, 4:47	2017-07-16
mouse	62	21:39:00	2017-07-16
dove	63	05:53:00	2017-07-17
dove	65	06:51:00	2017-07-17
squirrel	67,68	7:30, 7:35	2017-07-17
bird (unidentifiable)	69	09:22:00	2017-07-17
squirrel	70	10:01:00	2017-07-17
dove	71	05:36:00	2017-07-18
ocelot	72	05:04:00	2017-07-19
dove	73	05:59:00	2017-07-19
gray fox	74	11:45:00	2017-07-20		Attack
cam19	Videos	Time	Date			Total Number of Videos	38
Lowland paca	2	20:40:00	2017-06-25			Videos with non-human vertebrates without nothing	29
Central American agouti?	3	17:35:00	2017-06-26			Encounters of non-human vertebrates without nothing	26
bird	5	12:37:00	2017-06-28			Number of videos with potential snake predators	0
dove	6	05:48:00	2017-06-29			Encounters of potential snake predators	0
bird	7	12:28:00	2017-06-29			Number of potential snake predators detecting models	0
dove	8	16:26:00	2017-06-29			Number of potential snake predators attacking models	0
dove	11	15:16:00	2017-06-30			Number of potential snake predators "avoiding" models	0
dove	12	08:06:00	2017-07-01
mammal (unidentifiable)	13	05:45:00	2017-07-02
dove	14	16:39:00	2017-07-02
squirrel	15	06:55:00	2017-07-03
bird	16	07:30:00	2017-07-03
dove	17	03:41:00	2017-07-03
mammal	19	05:14:00	2017-07-05
tinamou (unidentifiable)	20	17:15:00	2017-07-06
dove	22	11:53:00	2017-07-07
doves	23	12:27:00	2017-07-07
dove	24	09:28:00	2017-07-08
Central American agouti?	25,26,27	2:34, 2:35, 2:36	2017-07-09
dove	28,29	10:43, 10:59	2017-07-11
bird maybe identify?	30	06:59:00	2017-07-13
Central American agouti?	32	15:23:00	2017-07-17
bird maybe identify?	33	17:49:00	2017-07-18
Central American agouti?	34	07:43:00	2017-07-19
dove	36	14:27:00	2017-07-19
quail	38	17:45:00	2017-07-19
cam20	Videos	Time	Date			Total Number of Videos	21
bird	2	10:33:00	2017-06-24			Videos with non-human vertebrates without nothing	15
lowland paca	4	02:23:00	2017-06-28			Encounters of non-human vertebrates without nothing	10
bird	5,6	2:41, 2:50	2017-06-28			Number of videos with potential snake predators	1
bird	7	05:33:00	2017-06-30			Encounters of potential snake predators	1
tinamou	9	05:26:00	2017-07-01			Number of potential snake predators detecting models	0
dove	10	09:00:00	2017-07-01			Number of potential snake predators attacking models	0
gray fox	12	12:46:00	2017-07-04			Number of potential snake predators "avoiding" models	0
dove	14	06:50:00	2017-07-08
tinamou	15,16,17	4:17, 4:19, 4:24	2017-07-14
tinamou	19,20,21	16:24, 16:26, 16:30	2017-07-18
cam21	Videos	Time	Date			Total Number of Videos	25
tinamou	1	17:24:00	2017-06-23			Videos with non-human vertebrates without nothing	20
bird (unidentifiable)	2	05:53:00	2017-06-24			Encounters of non-human vertebrates without nothing	18
dove	3	08:24:00	2017-06-26			Number of videos with potential snake predators	8
dove	4	08:50:00	2017-06-26			Encounters of potential snake predators	8
dove	8	05:49:00	2017-07-02			Number of potential snake predators detecting models	1
dove	9	05:55:00	2017-07-03			Number of potential snake predators attacking models	1
ocelot	10	05:38:00	2017-07-04			Number of potential snake predators "avoiding" models	0
bird (unidentifiable)	12	05:48:00	2017-07-09				0
ocelot	13	22:03:00	2017-07-09
dove	14	10:59:00	2017-07-11
mouse	15,16	20:35, 20:36	2017-07-11
possum	17	02:12:00	2017-07-12
nine-banded armadillo	18	04:03:00	2017-07-13
ocelot	19	18:44:00	2017-07-13
Lesson's motmot	20	17:39:00	2017-07-15
possum	21	19:03:00	2017-07-15
mouse	22,23	12:28, 12:56	2017-07-18
gray fox	25	08:27:00	2017-07-21		Attack
camdif	Videos	Time	Date			Total Number of Videos	0
did not work						Videos with non-human vertebrates without nothing	0
						Encounters of non-human vertebrates without nothing	0
						Number of videos with potential snake predators	0
						Encounters of potential snake predators	0
						Number of potential snake predators detecting models	0
						Number of potential snake predators attacking models	0
						Number of potential snake predators "avoiding" models	0

## Sheet: North Carolina
					Attack or Avoidance	Total Number of Videos	31		Total number of videos	660
cam1	Videos	Time	Date			Videos with non-human vertebrates without nothing	17		Total videos with non-human vertebrates without nothing	398
racoon	3	05:28:00	2017-10-20			Encounters of non-human vertebrates without nothing	16		Total encounters of non-human vertebrates without nothing	323
deer	4	17:54:00	2017-10-23			Number of videos with potential snake predators	4		Total number of videos with potential snake predators	178
deer	5	18:55:00	2017-10-23			Encounters of potential snake predators	4		Total encounters of potential snake predators	147
domestic dog	6	08:37:00	2017-10-24			Number of potential snake predators detecting models	1		Total number of potential snake predator detections	32
racoon	8	01:27:00	2017-10-25			Number of potential snake predators attacking models	0		Total number of potential snake predator attacks	12
squirrel	9	11:41:00	2017-10-25			Number of potential snake predators "avoiding" models	1		Total number of potential snake predator avoidances	20
squirrel	12	09:05:00	2017-10-29
fox squirrel	13	17:14:00	2017-10-29
domestic dog	15	00:03:00	2017-11-03
racoon	17	01:46:00	2017-11-08
deer	18	03:17:00	2017-11-08
fox squirrel	19	09:29:00	2017-11-08
fox squirrel	21,22	9:16, 9:22	2017-11-11
squirrel	23	10:17:00	2017-11-11
racoon	24	03:32:00	2017-11-13		Avoidance
rabbit	25	18:00:00	2017-11-13
cam2	Videos	Time	Date			Total Number of Videos	89
deer	1	19:25:00	2017-10-18			Videos with non-human vertebrates without nothing	70
gray fox	2	23:27:00	2017-10-18			Encounters of non-human vertebrates without nothing	53
deer	3,4	00:41, 00:42	2017-10-19			Number of videos with potential snake predators	12
racoon	6	01:46:00	2017-10-19			Encounters of potential snake predators	12
racoon	7	21:59:00	2017-10-19			Number of potential snake predators detecting models	1
fox squirrel	8	08:24:00	2017-10-20			Number of potential snake predators attacking models	1
rabbit	9	19:08:00	2017-10-20			Number of potential snake predators "avoiding" models
rabbit	10	05:16:00	2017-10-21
rabbit	11	18:48:00	2017-10-21
rabbit	13	06:23:00	2017-10-22
rabbit	14	19:06:00	2017-10-22
rabbit	16	06:49:00	2017-10-23
fox squirrel	17,18	10:22, 10:29	2017-10-23
fox squirrel	19	12:31:00	2017-10-23
racoon	20	03:16:00	2017-10-24
racoon	21	22:11:00	2017-10-24
deer	22	12:32:00	2017-10-25
gray fox	23	16:00:00	2017-10-25
rabbit	27,28	2:21,2:41	2017-10-27
rabbit	29	04:17:00	2017-10-27
rabbit	30	05:00:00	2017-10-27
rabbit	32	06:57:00	2017-10-27
fox squirrel	33	12:09:00	2017-10-27
black bear	35	19:11:00	2017-10-27		Attack
rabbit	36	06:34:00	2017-10-28
rabbit	37	07:04:00	2017-10-30
rabbit	38	19:12:00	2017-10-30
rabbit	39,40,41	20:21, 20:25, 20:27	2017-10-30
gray fox	44	15:40:00	2017-10-31
deer	45,46	17:48, 17:50	2017-10-31
domestic dog	48,49,50	11:26, 11:38, 12:03	11/2/2017-11/3/2017
squirrel	53	15:25:00	2017-11-03
rabbit	55,56,57	10:27, 10:28, 10:31	2017-11-04
deer	58	01:42:00	2017-11-05
gray fox	59	13:34:00	2017-11-05
domestic dog	60,61	17:46, 17:48	2017-11-05
rabbit	62	02:41:00	2017-11-06
domestic dog	65	11:58:00	2017-11-07
rabbit	67	18:20:00	2017-11-07
deer	68	02:14:00	2017-11-08
deer	69	03:13:00	2017-11-08
deer	70	18:02:00	2017-11-08
squirrel	71	13:42:00	2017-11-09
deer	72,73,74,75	1:20, 1:26, 1:31, 1:32	2017-11-10
deer	76,77	1:08, 1:14	2017-11-10
deer	79,80,81	16:32, 16:33, 16:55	2017-11-10
gray fox	82	15:03:00	2017-11-11
squirrel	83	14:20:00	2017-11-12
racoon	84	18:50:00	2017-11-13
deer	85	19:55:00	2017-11-13
deer	86	21:22:00	2017-11-13
deer	88	06:05:00	2017-11-15
gray fox	89	10:17:00	2017-11-15
cam3	Videos	Time	Date			Total Number of Videos	24
deer	1	19:19:00	2017-10-18			Videos with non-human vertebrates without nothing	12
racoon	2	03:05:00	2017-10-19			Encounters of non-human vertebrates without nothing	12
rabbit	4	05:50:00	2017-10-21			Number of videos with potential snake predators	4
gray fox	9	07:03:00	2017-10-25			Encounters of potential snake predators	4
deer	11	22:50:00	2017-10-27			Number of potential snake predators detecting models	1
deer	12	02:09:00	2017-11-01			Number of potential snake predators attacking models	0
domestic dog	16	17:45:00	2017-11-05			Number of potential snake predators "avoiding" models	1
deer	17	02:04:00	2017-11-08
black bear	20	20:25:00	2017-11-12
racoon	21	02:23:00	2017-11-13		Avoidance
domestic dog	22	10:46:00	2017-11-13
deer	24	06:08:00	2017-11-15
cam4	Videos	Time	Date			Total Number of Videos	23
racoon	1	20:49:00	2017-10-18		Avoidance	Videos with non-human vertebrates without nothing	16
deer	2	20:52:00	2017-10-18			Encounters of non-human vertebrates without nothing	15
rabbit	3	19:38:00	2017-10-19			Number of videos with potential snake predators	9
gray fox	4	22:33:00	2017-10-19		Avoidance	Encounters of potential snake predators	9
racoon	5	23:43:00	2017-10-22			Number of potential snake predators detecting models	2
squirrel	9	10:18:00	2017-10-25			Number of potential snake predators attacking models	0
crow	10	10:10:00	2017-10-28			Number of potential snake predators "avoiding" models	2
rabbit	11	02:00:00	2017-10-31
gray fox	12	15:28:00	2017-10-31
deer	13,14	17:17, 17:18	2017-10-31
gray fox	15	18:37:00	2017-10-31
domestic dog	19	17:46:00	2017-11-05
gray fox	20	12:49:00	2017-11-08
gray fox	21	05:47:00	2017-11-12
racoon	22	02:22:00	2017-11-13
cam5	Videos	Time	Date			Total Number of Videos	40
deer	1,2,3	19:58,19:59,20:05	2017-10-18			Videos with non-human vertebrates without nothing	35
gray fox	4	23:24:00	2017-10-18			Encounters of non-human vertebrates without nothing	24
deer	5	02:35:00	2017-10-19			Number of videos with potential snake predators	8
fox squirrel	6,7	12:40, 12:53	2017-10-19			Encounters of potential snake predators	7
squirrel	8	18:12:00	2017-10-22			Number of potential snake predators detecting models	0
racoon	9	20:49:00	2017-10-23			Number of potential snake predators attacking models	0
deer	10	06:07:00	2017-10-25			Number of potential snake predators "avoiding" models	0
fox squirrel	11	10:34:00	2017-10-25
squirrel	12,13,14,15,16	11:12,11:13,11:24,11:28,11:29	2017-10-25
fox squirrel	17	09:39:00	2017-10-30
gray fox	18,19	15:22,15:23	2017-10-31
deer	20,21	16:27,16:28	2017-10-31
deer	22	17:12:00	2017-10-31
rabbit	23,24,25	19:17,19:20,19:21	2017-10-31
gray fox	27	14:46:00	2017-11-02
domestic dog	28	23:28:00	2017-11-02
racoon	30	21:20:00	2017-11-04
rabbit	32	03:22:00	2017-11-06
rabbit	35	04:55:00	2017-11-09
fox squirrel	36	10:27:00	2017-11-10
deer	37	19:47:00	2017-11-10
small bird	38	10:08:00	2017-11-11
racoon	39	22:59:00	2017-11-11
racoon	40	02:12:00	2017-11-13
cam6	Videos	Time	Date			Total Number of Videos	62
deer	1	19:24:00	2017-10-18			Videos with non-human vertebrates without nothing	17
racoon	2	20:42:00	2017-10-18		Avoidance	Encounters of non-human vertebrates without nothing	16
deer	3	01:31:00	2017-10-19			Number of videos with potential snake predators	11
racoon	4	05:52:00	2017-10-20		Avoidance	Encounters of potential snake predators	10
racoon	13	22:49:00	2017-10-22			Number of potential snake predators detecting models	2
fox squirrel	15	11:23:00	2017-10-23			Number of potential snake predators attacking models	0
rabbit	44	04:01:00	2017-10-31			Number of potential snake predators "avoiding" models	2
deer	46	17:08:00	2017-10-31
racoon	47,48	1:14,1:18	2017-11-01
rabbit	51	07:04:00	2017-11-02
gray fox	52	13:09:00	2017-11-02
possum	54	22:11:00	2017-11-03
crow	58	07:14:00	2017-11-07
gray fox	59	17:38:00	2017-11-07
racoon	61	02:07:00	2017-11-13
racoon	62	18:25:00	2017-11-13
cam7	Videos	Time	Date			Total Number of Videos	26
racoon	6	21:51:00				Videos with non-human vertebrates without nothing	10
rabbit	7	00:51:00				Encounters of non-human vertebrates without nothing	8
rabbit	15	01:40:00				Number of videos with potential snake predators	5
racoon	18	21:07:00				Encounters of potential snake predators	3
deer	20	01:44:00				Number of potential snake predators detecting models	1
deer	21	13:08:00				Number of potential snake predators attacking models	0
deer	22	16:09:00				Number of potential snake predators "avoiding" models	1
racoon	24,25,26	1:32, 1:33, 1:34			Avoidance
cam8	Videos	Time	Date			Total Number of Videos	29
racoon	1,2	2:19, 2:23	2017-10-19		Avoidance	Videos with non-human vertebrates without nothing	20
racoon	3,4,5,6	19:29, 19:47, 20:22, 20:39	2017-10-21		Avoidance	Encounters of non-human vertebrates without nothing	16
racoon	7	18:54:00	2017-10-23			Number of videos with potential snake predators	16
deer	10	23:06:00	2017-10-27			Encounters of potential snake predators	12
possum	11	01:26:00	2017-10-29			Number of potential snake predators detecting models	2
rabbit	13	03:11:00	2017-10-31			Number of potential snake predators attacking models	0
racoon	14	04:13:00	2017-10-31			Number of potential snake predators "avoiding" models	2
deer	15	02:18:00	2017-11-01
rabbit	16	03:44:00	2017-11-01
black bear	19	04:32:00	2017-11-04
racoon	22	23:33:00	2017-11-08
racoon	23	00:13:00	2017-11-09
gray fox	24	13:20:00	2017-11-10
racoon	25	23:33:00	2017-11-11
racoon	26	00:35:00	2017-11-12
black bear	28	18:22:00	2017-11-12
cam9	Videos	Time	Date			Total Number of Videos	32
gray fox	3	14:16:00	2017-10-21			Videos with non-human vertebrates without nothing	23
racoon	4,5,6	19:49,20:20,20:25	2017-10-21			Encounters of non-human vertebrates without nothing	20
gray fox	7	06:53:00	2017-10-23			Number of videos with potential snake predators	15
racoon	8	18:56:00	2017-10-23		Avoidance	Encounters of potential snake predators	12
racoon	9	00:36:00	2017-10-25			Number of potential snake predators detecting models	2
gray fox	10	18:37:00	2017-10-25			Number of potential snake predators attacking models	0
gray fox	11	18:44:00	2017-10-26		Avoidance	Number of potential snake predators "avoiding" models	2
racoon	13	04:16:00	2017-10-31
gray fox	14	05:05:00	2017-10-31
rabbit	15	03:47:00	2017-11-01
domestic dog	18	23:45:00	2017-11-02
domestic dog	22	17:38:00	2017-11-05
racoon	23	05:32:00	2017-11-06
gray fox	24,25	17:30,17:40	2017-11-07
fox squirrel	26	14:33:00	2017-11-10
deer	27	16:30:00	2017-11-10
racoon	29	01:54:00	2017-11-13
deer	30	21:13:00	2017-11-13
squirrel	31	09:52:00	2017-11-14
deer	32	06:12:00	2017-11-15
cam10	Videos	Time	Date			Total Number of Videos	34
deer	2	14:17:00	2017-10-19			Videos with non-human vertebrates without nothing	16
possum	3	02:16:00	2017-10-20		Avoidance	Encounters of non-human vertebrates without nothing	15
gray fox	6	16:30:00	2017-10-25			Number of videos with potential snake predators	5
deer	7	18:48:00	2017-10-25			Encounters of potential snake predators	5
racoon	17	05:06:00	2017-10-31			Number of potential snake predators detecting models	1
deer	18	17:48:00	2017-10-31			Number of potential snake predators attacking models	0
rabbit	19	05:00:00	2017-11-01			Number of potential snake predators "avoiding" models	1
squirrel	23	10:38:00	2017-11-02
domestic dog	24	23:24:00	2017-11-02
mammal	27	13:46:00	2017-11-04
racoon	28	05:40:00	2017-11-06
domestic dog	29,30	11:07,11:08	2017-11-07
racoon	32	02:23:00	2017-11-11
deer	33	21:10:00	2017-11-13
deer	34	06:16:00	2017-11-15
cam11	Videos	Time	Date			Total Number of Videos	26
squirrel	2,3	17:53,17:57	2017-10-20			Videos with non-human vertebrates without nothing	19
possum	4	05:29:00	2017-10-22			Encounters of non-human vertebrates without nothing	13
racoon	6,7	23:03,23:04	2017-10-22			Number of videos with potential snake predators	5
squirrel	9	08:31:00	2017-10-23			Encounters of potential snake predators	4
squirrel	10,11	8:06, 8:15	2017-10-24			Number of potential snake predators detecting models	1
squirrel	12	10:00:00	2017-10-24			Number of potential snake predators attacking models	0
racoon	14	03:00:00	2017-10-27		Avoidance	Number of potential snake predators "avoiding" models	1
rabbit	15	03:50:00	2017-10-28
squirrel	16,17,18	17:23, 17:24, 17:25	2017-10-28
hermit thrush	19	18:20:00	2017-10-29
deer	20,21	21:26,21:27	2017-10-30
gray fox	22	00:54:00	2017-11-03
deer	26	17:13:00	2017-11-13
cam12	Videos	Time	Date			Total Number of Videos	41
black bear	1	01:02:00	2017-10-21			Videos with non-human vertebrates without nothing	20
black bear	2	19:00:00	2017-10-21		Attack	Encounters of non-human vertebrates without nothing	13
black bear	3	00:44:00	2017-10-22			Number of videos with potential snake predators	18
turkey	4	08:05:00	2017-10-22			Encounters of potential snake predators	11
gray fox	8,9	18:03,18:04	2017-10-25		Attack	Number of potential snake predators detecting models	2
black bear	11,12	23:22,23:23	2017-10-25			Number of potential snake predators attacking models	2
black bear	23,24,25,26	21:03,21:06,21:07,21:09	2017-10-26			Number of potential snake predators "avoiding" models	0
black bear	27	00:04:00	2017-10-27
rabbit	28	03:46:00	2017-10-28
black bear	29	03:45:00	2017-10-31
black bear	33,34,35	18:34,18:35,18:36	2017-11-07
mammal	37	18:26:00	2017-11-08
possum	40	01:52:00	2017-11-13
cam13	Videos	Time	Date			Total Number of Videos
did not work						Videos with non-human vertebrates without nothing
						Encounters of non-human vertebrates without nothing
						Number of videos with potential snake predators
						Encounters of potential snake predators
						Number of potential snake predators detecting models
						Number of potential snake predators attacking models
						Number of potential snake predators "avoiding" models
cam14	Videos	Time	Date			Total Number of Videos	52
black bear	2	04:56:00	2017-10-20		Avoidance	Videos with non-human vertebrates without nothing	5
deer	3	18:08:00	2017-10-21			Encounters of non-human vertebrates without nothing	5
black bear	20	02:37:00	2017-10-31			Number of videos with potential snake predators	3
turkey	29	15:35:00	2017-11-01			Encounters of potential snake predators	3
hermit thrush	41	17:44:00	2017-11-04			Number of potential snake predators detecting models	1
						Number of potential snake predators attacking models	0
						Number of potential snake predators "avoiding" models	1
cam15	Videos	Time	Date			Total Number of Videos	18
racoon	1	20:06:00	2017-10-21		Avoidance	Videos with non-human vertebrates without nothing	16
fox squirrel	2	12:46:00	2017-10-22			Encounters of non-human vertebrates without nothing	12
racoon	3	02:32:00	2017-10-23		Avoidance	Number of videos with potential snake predators	11
black bear	4	06:54:00	2017-10-26		Avoidance	Encounters of potential snake predators	7
black bear	6	02:36:00	2017-10-31			Number of potential snake predators detecting models	5
black bear	7,8	20:18,20:19	2017-11-02		Attack	Number of potential snake predators attacking models	2
black bear	9,10,11	4:05,4:06,4:07	2017-11-04		Attack	Number of potential snake predators "avoiding" models	3
deer	12	05:26:00	2017-11-07
racoon	14,15	1:02,1:05	2017-11-09
deer	16	17:22:00	2017-11-13
squirrel	17	06:30:00	2017-11-14
fox squirrel	18	09:56:00	2017-11-14
cam16	Videos	Time	Date
did not work
cam17	Videos	Time	Date
did not work
cam18	Videos	Time	Date
did not work
cam19	Videos	Time	Date			Total Number of Videos	9
possum	2	03:34:00				Videos with non-human vertebrates without nothing	4
deer	4	02:51:00				Encounters of non-human vertebrates without nothing	4
rabbit	5	01:17:00				Number of videos with potential snake predators	1
squirrel	6	08:34:00				Encounters of potential snake predators	1
						Number of potential snake predators detecting models	0
						Number of potential snake predators attacking models	0
						Number of potential snake predators "avoiding" models	0
cam20	Videos	Time	Date			Total Number of Videos	69
rabbit	1,2,3	5:57,5:58,6:02	2017-10-20			Videos with non-human vertebrates without nothing	52
northern cardinal	4	15:11:00	2017-10-20			Encounters of non-human vertebrates without nothing	42
racoon	5,6	19:06,19:07	2017-10-21		Attack, Avoidance	Number of videos with potential snake predators	39
rabbit	8	02:24:00	2017-10-22			Encounters of potential snake predators	32
rabbit	11	21:52:00	2017-10-26			Number of potential snake predators detecting models	6
racoon	13	04:01:00	2017-10-28		Avoidance	Number of potential snake predators attacking models	3
gray fox	14	17:51:00	2017-10-28		Avoidance	Number of potential snake predators "avoiding" models	3
possum	15	03:38:00	2017-10-29
racoon	16	20:26:00	2017-10-29		Attack
rabbit	17,18	2:29,2:30	2017-10-31
gray fox	19,20	10:09,10:11	2017-10-31		Attack
squirrel	21	13:08:00	2017-10-31
deer	24	18:33:00	2017-11-06
black bear	28	02:42:00	2017-11-08
racoon	29	21:27:00	2017-11-09
racoon	30	00:32:00	2017-11-10
racoon	31,32	5:09,5:30	2017-11-10
deer	35	17:40:00	2017-11-10
racoon	36	17:57:00	2017-11-10
racoon	37,38,39	3:03,3:04,3:23	2017-11-11
racoon	40	04:21:00	2017-11-11
racoon	41,42	18:35,18:43	2017-11-11
racoon	43	20:34:00	2017-11-11
racoon	44	23:35:00	2017-11-11
racoon	45	00:56:00	2017-11-12
racoon	46	01:30:00	2017-11-12
racoon	47	03:06:00	2017-11-12
racoon	48	20:23:00	2017-11-12
racoon	49	22:21:00	2017-11-12
racoon	50	23:26:00	2017-11-12
racoon	51	19:00:00	2017-11-13
racoon	52	21:04:00	2017-11-13
racoon	54	18:49:00	2017-11-14
racoon	55	00:11:00	2017-11-15
racoon	57	02:25:00	2017-11-15
squirrel	58	06:51:00	2017-11-15
squirrel	59	07:52:00	2017-11-15
racoon	61	18:19:00	2017-11-15
racoon	62	18:55:00	2017-11-15
racoon	63	19:55:00	2017-11-15
racoon	64	22:37:00	2017-11-15
racoon	65,66	1:17,1:18	2017-11-16
cam21	Videos	Time	Date			Total Number of Videos	31
squirrel	1	14:02:00	2017-10-19			Videos with non-human vertebrates without nothing	29
possum	2,3	00:22,00:23	2017-10-21		Avoidance	Encounters of non-human vertebrates without nothing	22
possum	4	07:24:00	2017-10-21			Number of videos with potential snake predators	7
squirrel	5,6,7	8:07,8:14,8:42	2017-10-23			Encounters of potential snake predators	6
squirrel	8	12:45:00	2017-10-25			Number of potential snake predators detecting models	2
squirrel	9	12:54:00	2017-10-26			Number of potential snake predators attacking models	1
squirrel	10	09:24:00	2017-10-27			Number of potential snake predators "avoiding" models	1
squirrel	11	13:19:00	2017-10-27
deer	14,15	4:23,4:24	2017-10-30
squirrel	16	08:16:00	2017-10-31
squirrel	17	11:46:00	2017-11-01
squirrel	18	16:14:00	2017-11-02
possum	19	22:20:00	2017-11-06		Attack
squirrel	20,21	15:54,15:55	2017-11-07
squirrel	22	16:49:00	2017-11-07
possum	23	19:35:00	2017-11-10
squirrel	24	15:35:00	2017-11-11
possum	25	22:44:00	2017-11-12
racoon	26	01:57:00	2017-11-13
deer	27,28	17:53,18:09	2017-11-14
deer	29,30	19:08,19:09	2017-11-14
squirrel	31	08:24:00	2017-11-15
cambest	Videos	Time	Date			Total Number of Videos	24
possum	3	03:38:00	2017-10-20			Videos with non-human vertebrates without nothing	17
possum	4	02:58:00	2017-10-22			Encounters of non-human vertebrates without nothing	17
racoon	5	02:38:00	2017-10-24			Number of videos with potential snake predators	5
racoon	6	05:18:00	2017-10-25		Attack	Encounters of potential snake predators	5
squirrel	7	18:03:00	2017-10-25			Number of potential snake predators detecting models	1
squirrel	8	07:24:00	2017-10-27			Number of potential snake predators attacking models	1
deer	9	09:52:00	2017-10-27			Number of potential snake predators "avoiding" models	0
squirrel	12	15:01:00	2017-11-07
squirrel	14	15:45:00	2017-11-07
possum	15	00:07:00	2017-11-08
squirrel	16	15:19:00	2017-11-09
squirrel	18	08:31:00	2017-11-11
squirrel	19	06:54:00	2017-11-12
squirrel	20	07:09:00	2017-11-12
squirrel	21	07:57:00	2017-11-12
squirrel	22	15:43:00	2017-11-12
squirrel	23	06:21:00	2017-11-15
camdif	Videos	Time	Date
did not work

## Sheet: Key
encounter with potential snake predator
uncertainty in identification of animal
bold text indicates the predator detected replica
